# Supplementary material for: Microbiological and virulence aspects of Rhodotorula mucilaginosa
Source: PubMed Central journal article supplement (PMC7290102), 2020-05-27
Supplement: EXCLI-19-687-s-001.pdf [file EXCLI-19-687-s-001.pdf]

**Original article:**

**MICROBIOLOGICAL AND VIRULENCE ASPECTS OF  
*RHODOTORULA MUCILAGINOSA***

Isabele Carrilho Jarros<sup>1</sup>, Flávia Franco Veiga<sup>1</sup>, Jakeline Luiz Corrêa<sup>1</sup>, Isabella Letícia Esteves Barros<sup>1</sup>, Marina Cristina Gadelha<sup>1</sup>, Morgana F. Voidaleski<sup>2</sup>, Neli Pieralisi<sup>3</sup>, Raissa Bocchi Pedroso<sup>1</sup>, Vânia A. Vicente<sup>2</sup>, Melyssa Negri<sup>1</sup>, Terezinha Inez Estivalet Svidzinski<sup>1\*</sup>

<sup>1</sup> Division of Medical Mycology, Teaching and Research Laboratory in Clinical Analyses – Department of Clinical Analysis of State University of Maringá, Paraná, Brazil

<sup>2</sup> Postgraduate Program in Microbiology, Parasitology, and Pathology, Biological Sciences, Department of Basic Pathology, Federal University of Parana, Curitiba, Brazil

<sup>3</sup> Department of Dentistry, State University of Maringá, Maringá, Paraná, Brazil

\* **Corresponding author:** Terezinha Inez Estivalet Svidzinski, Division of Medical Mycology, Teaching and Research Laboratory in Clinical Analysis – Department of Clinical Analysis of State University of Maringá, Paraná, Brazil. Av. Colombo, 5790 CEP: 87020-900. Maringá, PR., Brazil. Phone: +5544 3011-4809, Fax: +5544 3011-4860, E-mail: [tiesvidzinski@uem.br](mailto:tiesvidzinski@uem.br) or [terezinha.svidzinski@gmail.com](mailto:terezinha.svidzinski@gmail.com)

<http://dx.doi.org/10.17179/excli2019-1672>

This is an Open Access article distributed under the terms of the Creative Commons Attribution License (<http://creativecommons.org/licenses/by/4.0/>).

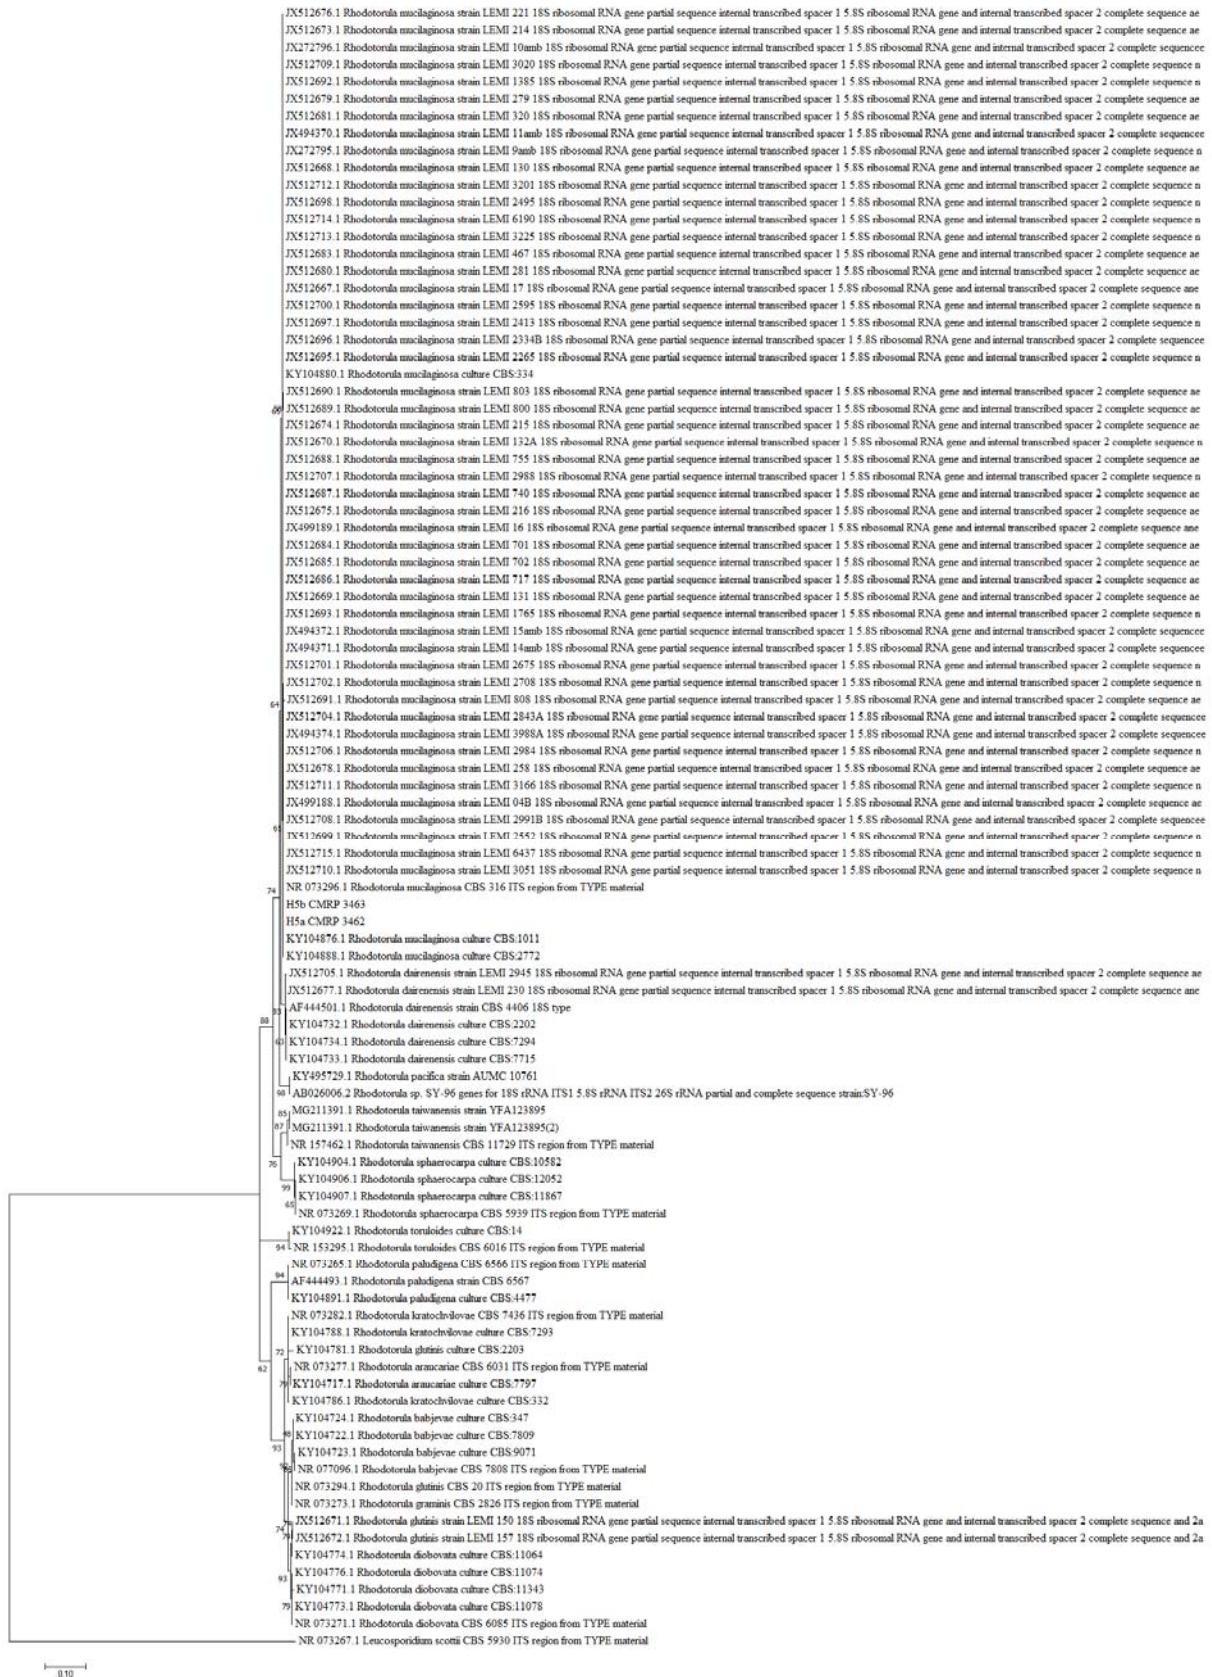

**Supplementary Figure 1:** Phylogenetic analysis of *Rhodotorula mucilaginosa*, based on ITS sequences constructed with Maximum likelihood, based on the Tamura-Nei model + Gamma distribution (T92+G) implemented in MEGA v.7. Bootstrap support was calculated from 1000 replicates. (T) = type strain of the species. Bootstrap values > 80 % were considered statistically significant.
